# Supplementary material for: Short-term microplastic effects on marine meiofauna abundance, diversity and community composition
Source: PeerJ. 2024 Jul 31;12:e17641. doi: 10.7717/peerj.17641 (PMC11297435; doi:10.7717/peerj.17641)
Supplement: Supplemental Information 7 — Full data counts for meiofauna over time for all treatment of the experiment of microplastic absortion. [file peerj-12-17641-s007.xlsx]

## Sheet: Data experimental
	1	2	3	4	5	6	7	8	9	10	11	12	13	14	15	16	17	18	19	20	21	22	23	24	25	26	27	28	29	30	31	32	33	34	35	36	37	38	39	40	41	42	43	44	45	46	47	48
Nematoda	122	151	137	231	3	3	1	1	36	3	12	43	94	77	85	43	157	107	79	311	14	12	6	9	49	68	163	88	292	168	119	119	129	143	130	223	37	52	72	49	62	80		50	279	173	159	123
Oligochaeta	0	0	0	0	0	0	0	0	0	0	0	0	0	0	0	0	0	0	0	0	0	0	0	0	0	0	0	0	0	0	0	1	0	0	0	0	0	0	0	0	0	0		0	0	0	0	0
Ostracoda	1	0	0	0	0	0	0	0	0	0	0	0	0	0	0	0	1	0	0	0	0	0	0	0	0	0	0	0	0	1	0	0	0	0	0	0	0	0	0	0	0	0		0	1	0	0	0
Gastrotricha	5	1	7	4	0	0	1	1	1	1	1	0	2	3	1	1	3	2	4	2	2	1	2	2	6	6	13	5	3	7	10	3	5	4	1	11	4	12	14	7	8	1		2	26	3	3	5
Copepoda	4	4	2	12	2	0	0	0	2	0	0	1	6	11	2	6	0	0	0	0	2	0	0	0	2	2	3	0	6	0	1	0	5	5	4	3	1	3	3	2	0	1		3	6	0	3	5
turbellarians	19	21	64	31	0	4	0	0	6	1	13	11	20	10	10	53	15	7	14	14	5	1	0	1	7	16	28	9	6	12	9	34	8	10	11	16	7	15	5	5	20	12		8	13	7	9	8
Tardigrada	2	0	4	0	0	0	0	0	1	0	0	0	1	2	1	0	0	1	2	0	1	0	0	1	1	1	0	1	3	1	2	1	2	2	0	5	0	2	0	2	6	1		1	1	0	0	2
Nauplii	0	2	4	3	5	0	0	0	0	1	0	0	1	2	0	3	3	0	0	0	1	0	1	0	0	2	0	1	1	0	0	1	12	0	2	3	1	3	4	4	0	0		1	0	0	1	12
Acari	0	1	0	1	0	0	0	0	0	0	0	0	2	9	2	0	0	0	0	1	0	1	0	0	0	0	0	0	2	0	1	1	0	0	0	0	0	0	0	0	0	0		0	0	0	0	0
Polychaeta	0	0	0	0	0	0	0	0	0	0	0	0	1	0	0	0	0	0	0	0	0	0	0	0	0	0	0	0	0	0	0	0	0	0	0	0	0	0	0	0	0	0		0	1	0	0	0
Time	T3	T3	T3	T3	T3	T3	T3	T3	T3	T3	T3	T3	T3	T3	T3	T3	T6	T6	T6	T6	T6	T6	T6	T6	T6	T6	T6	T6	T6	T6	T6	T6	T9	T9	T9	T9	T9	T9	T9	T9	T9	T9	T9	T9	T9	T9	T9	T9
Treatments	C	C	C	C	10³	10³	10³	10³	10^5	10^5	10^5	10^5	10^7	10^7	10^7	10^7	C	C	C	C	10³	10³	10³	10³	10^5	10^5	10^5	10^5	10^7	10^7	10^7	10^7	C	C	C	C	10³	10³	10³	10³	10^5	10^5	10^5	10^5	10^7	10^7	10^7	10^7
Becker	1	2	3	4	5	6	7	8	9	10	11	12	13	14	15	16	1	2	3	4	5	6	7	8	9	10	11	12	13	14	15	16	1	2	3	4	5	6	7	8	9	10	11	12	13	14	15	16

## Sheet: Raw Data
	1	2	3	4	5	6	7	8
Nematoda	138	143	142	127	26	97	107	81
Oligochaeta	2	0	3	1	0	0	0	0
Ostracoda	0	0	0	0	0	0	0	0
Gastrotricha	148	128	163	89	1	6	5	4
Copepoda	22	19	6	14	3	11	15	11
turbellarians	32	32	45	31	3	20	28	13
Tardigrada	6	5	2	1	0	1	2	0
Nauplii	102	100	124	123	1	6	10	1
Acari	0	0	1	1	0	0	1	1
Polychaeta	13	21	4	6	0	0	1	1
Time	CAmb	CAmb	CAmb	CAmb	T0	T0	T0	T0
